# Supplementary material for: Structural and Biochemical Analysis of the Recombination Mediator Protein RecR from Campylobacter jejuni
Source: MDPI journal article supplement (doi:10.3390/ijms241612947), 2023-08-18
Supplement: s1 [file s1]

**A**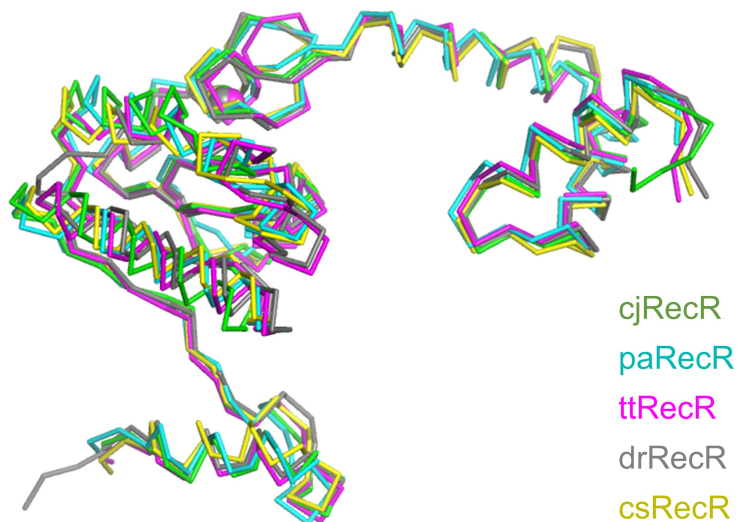**B**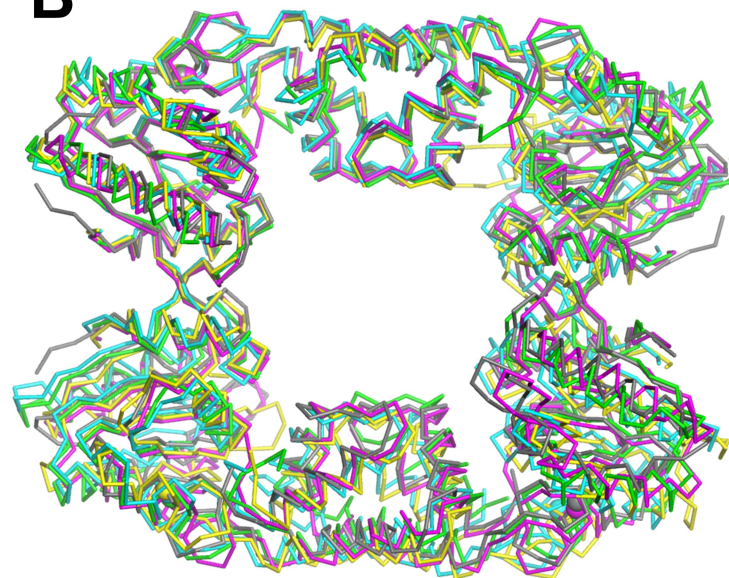

**Figure S1.** Similar structures of cjRecR (green), paRecR (PDB ID 5Z2V; cyan), ttRecR (PDB ID 5ZVQ; magenta), drRecR (PDB ID 1VDD; gray), and csRecR (PDB ID 3VDP; yellow). RecR proteins and zinc ions are shown as C $\alpha$  traces and spheres, respectively. **(A)** Similar monomer structures of RecR orthologs. **(B)** Similar tetramer structures of RecR orthologs. The tetrameric structures are overlaid using the monomer structures shown in Fig. S1A.

**A**

| RMSD (Å) between cjRecR chains |      |      |      |
|--------------------------------|------|------|------|
|                                | A-B  | A-C  | A-D  |
| Full-length                    | 0.42 | 1.08 | 2.57 |
| NTD                            | 0.37 | 0.37 | 0.42 |
| MD                             | 0.19 | 0.29 | 0.39 |
| CTD                            | 0.18 | 0.60 | 0.48 |

**B**

Full-length superposition

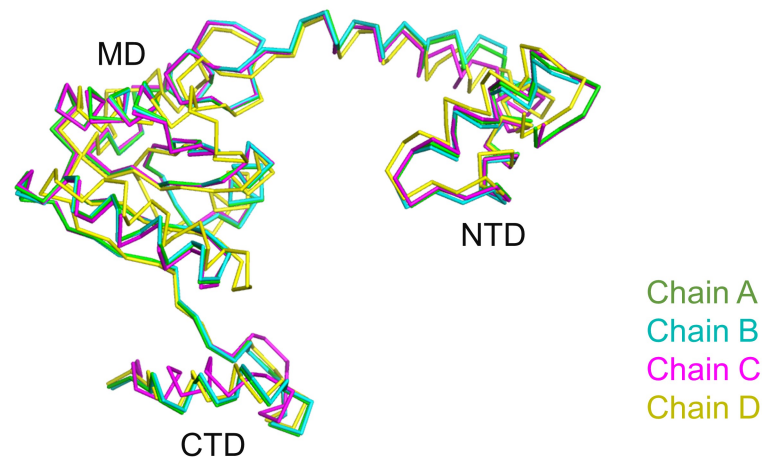**C**

NTD superposition

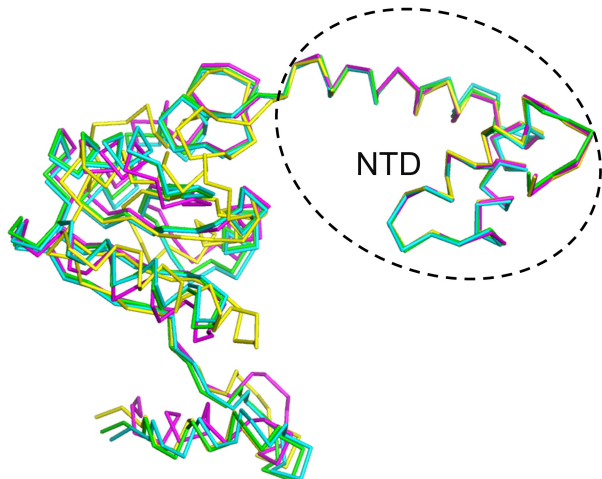**D**

MD superposition

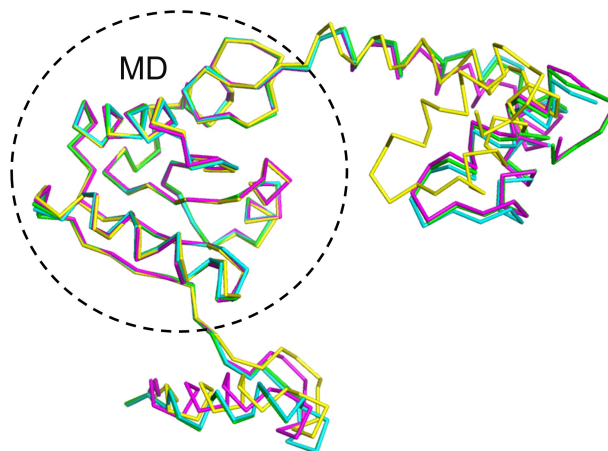**E**

CTD superposition

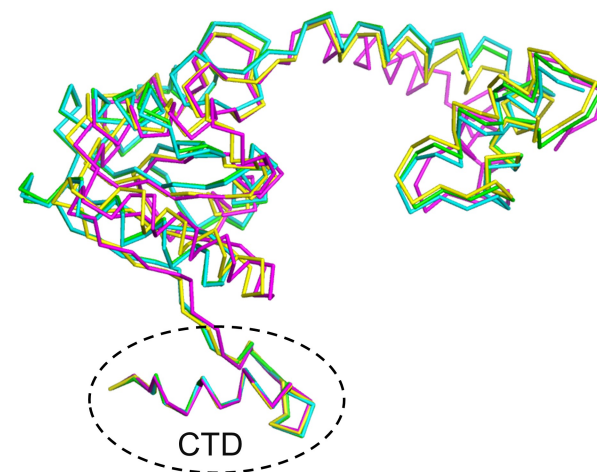

**Figure S2.** Overlays of the four cjRecR chains observed in the asymmetric unit of the cjRecR crystal. (A) RMSD values between the four cjRecR chains for the entire structure or each domain. (B) cjRecR chains superimposed using the entire structure. (C) cjRecR chains superimposed using the NTD. (D) cjRecR chains superimposed using the MD. (E) cjRecR chains superimposed using the CTD.

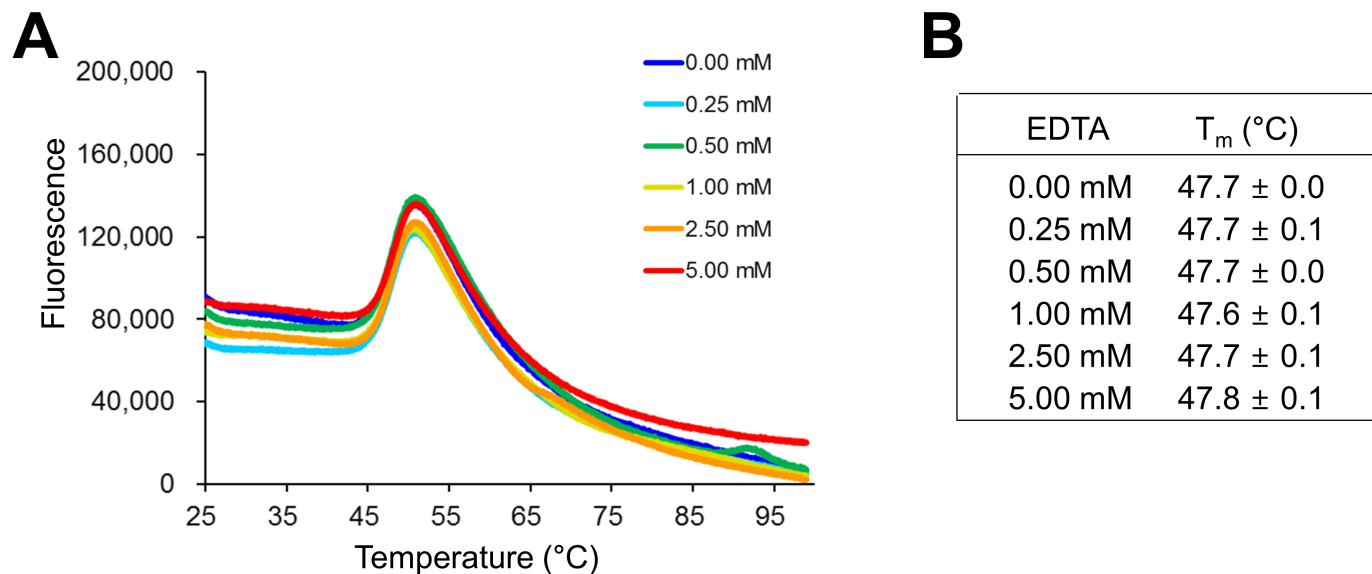

**Figure S3.** No significant change in the protein stability of the *X. campestris* FliD control protein in response to EDTA. The T<sub>m</sub> of FliD (**B**) was determined in the presence and absence of EDTA via a thermal shift assay (**A**). The data (**A**) are representative of three independent experiments that yielded similar results, and the T<sub>m</sub> values (**B**) represent the means ± S.D. from the three independent experiments.

**Table S1.** Crystallographic statistics of the cjRecR structure.

| cjRecR                              |                                               |
|-------------------------------------|-----------------------------------------------|
| <b>Data collection</b>              |                                               |
| Space group                         | C2                                            |
| Cell parameters                     | a = 231.43, b = 64.19, c = 74.62, β = 100.60° |
| Wavelength (Å)                      | 0.9793                                        |
| Resolution (Å)                      | 30.00-2.60                                    |
| Highest resolution (Å)              | 2.64-2.60                                     |
| No. unique reflections              | 32,226 (1,614) <sup>a</sup>                   |
| R <sub>merge</sub> (%) <sup>b</sup> | 7.1 (59.1) <sup>a</sup>                       |
| R <sub>meas</sub> (%) <sup>c</sup>  | 8.5 (71.0) <sup>a</sup>                       |
| R <sub>pim</sub> (%) <sup>d</sup>   | 4.7 (38.9) <sup>a</sup>                       |
| CC <sub>1/2</sub> <sup>e</sup>      | 0.992 (0.666) <sup>a</sup>                    |
| I/sigma(I)                          | 19.5 (2.1) <sup>a</sup>                       |
| Completeness (%)                    | 97.0 (97.2) <sup>a</sup>                      |
| Redundancy                          | 2.8 (2.8) <sup>a</sup>                        |
| <b>Refinement</b>                   |                                               |
| Resolution (Å)                      | 30.00-2.60                                    |
| No. of reflections (work)           | 30,605                                        |
| No. of reflections (test)           | 1,616                                         |
| R <sub>work</sub> (%) <sup>f</sup>  | 20.7                                          |
| R <sub>free</sub> (%) <sup>g</sup>  | 24.6                                          |
| No. atoms                           |                                               |
| Protein                             | 5,659                                         |
| Zinc ion                            | 4                                             |
| Water                               | 32                                            |
| Average B-value (Å <sup>2</sup> )   | 61.3                                          |
| RMSD bonds (Å)                      | 0.004                                         |
| RMSD angles (°)                     | 0.630                                         |
| Ramachandran <sup>h</sup> (favored) | 95.3%                                         |
| (outliers)                          | 0.0%                                          |

<sup>a</sup> Numbers in parentheses were calculated from data of the highest resolution shell.

$$^b R_{\text{merge}} = \sum_{\text{hkl}} \sum_i |I_i(\text{hkl}) - \langle I(\text{hkl}) \rangle| / \sum_{\text{hkl}} \sum_i I_i(\text{hkl})$$

$$^c R_{\text{meas}} = \sum_{\text{hkl}} \{ N(\text{hkl}) / [N(\text{hkl}) - 1] \}^{1/2} \sum_i | I_i(\text{hkl}) - \langle I(\text{hkl}) \rangle | / \sum_{\text{hkl}} \sum_i I_i(\text{hkl})$$

$$^d R_{\text{rim}} = \sum_{\text{hkl}} \{1/[N(\text{hkl}) - 1]\}^{1/2} \sum_i |I_i(\text{hkl}) - \langle I(\text{hkl}) \rangle| / \sum_{\text{hkl}} \sum_i I_i(\text{hkl})$$

<sup>e</sup>Correlation coefficient between intensities from random half-data sets.

<sup>f</sup>  $R_{\text{work}} = \Sigma |F_{\text{obs}}| - |F_{\text{calc}}| / \Sigma |F_{\text{obs}}|$ , where  $F_{\text{calc}}$  and  $F_{\text{obs}}$  are the calculated and observed structure factor amplitudes, respectively.

<sup>g</sup>  $R_{\text{free}}$  = as for  $R_{\text{work}}$ , except that 5% of the total reflections were selected at random and omitted from refinement.

<sup>h</sup>Calculated using MolProbity (<http://molprobity.biochem.duke.edu>).
